# Supplementary material for: Fluorescein Derivatives as Antibacterial Agents Acting via Membrane Depolarization
Source: PubMed Central journal article supplement (PMC7072581; doi:10.3390/biom10020309), 2020-02-15
Supplement: biomolecules-10-00309-s001.pdf [file biomolecules-10-00309-s001.pdf]

### Scheme S1: Synthesis of tol-mitoFluo.

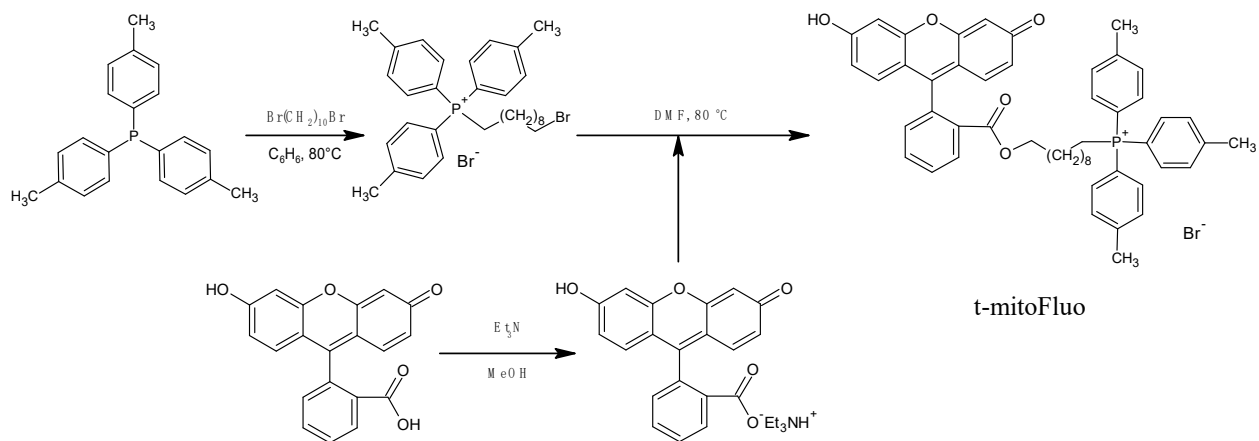

### Scheme S2: Synthesis of C10-FL.

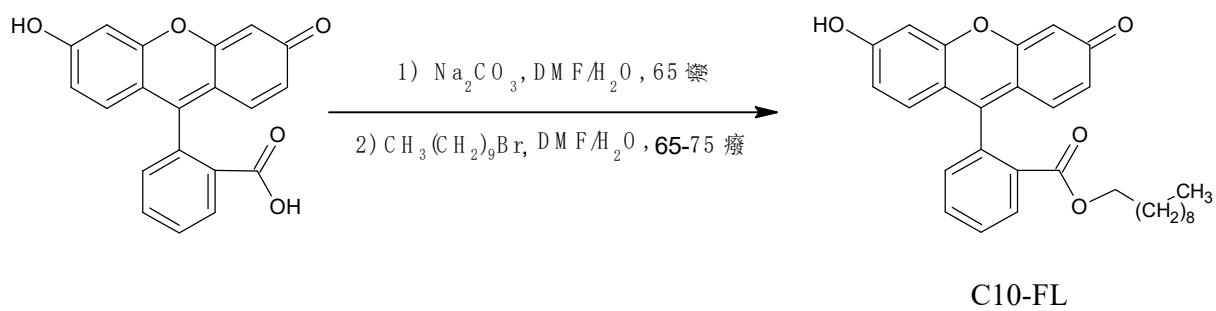

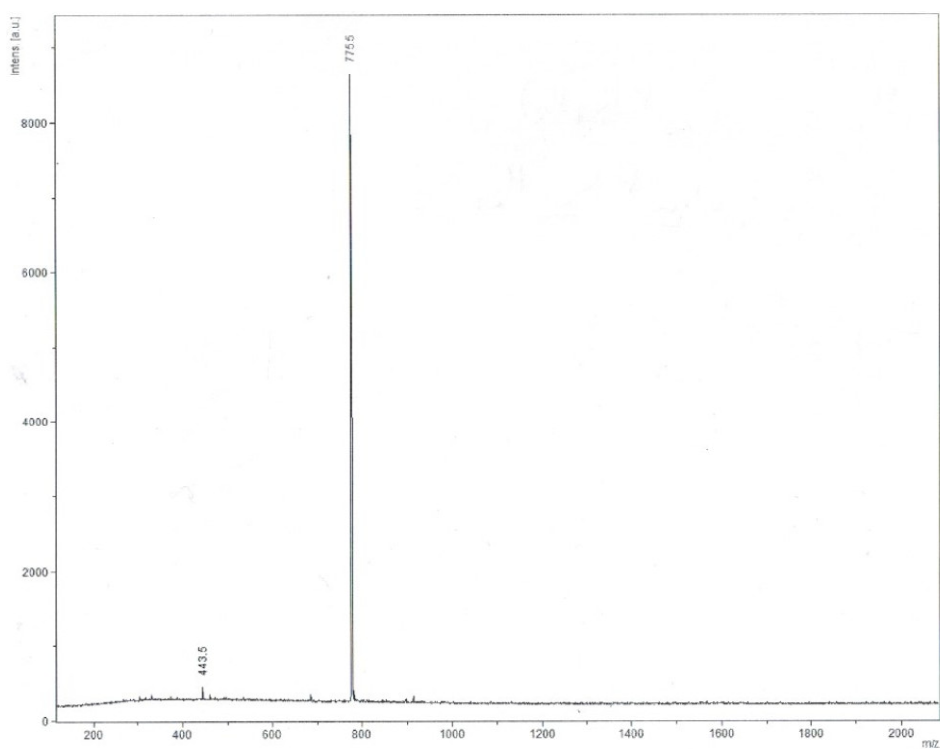

Figure S1. MALDI spectra of tol-mitoFluo.

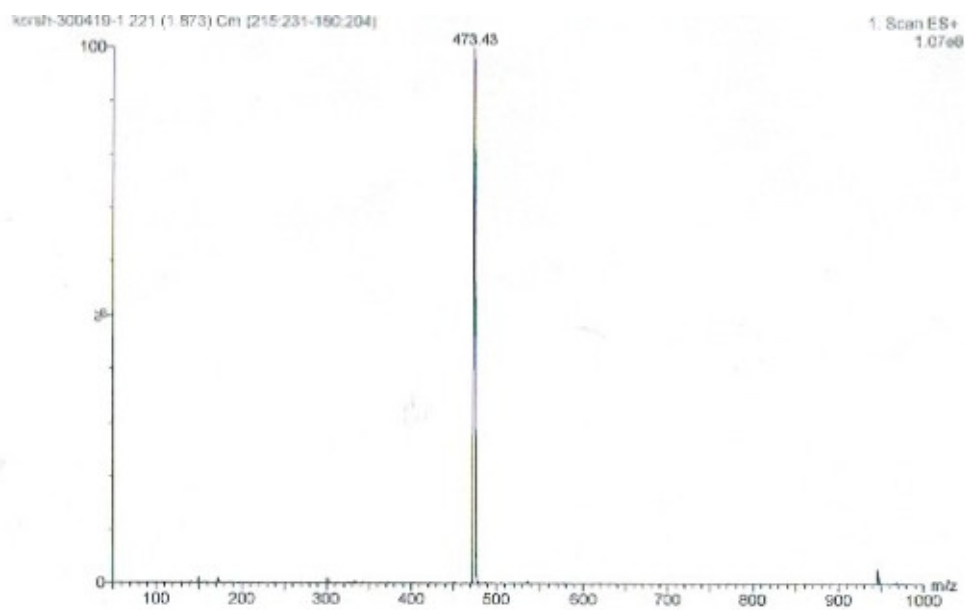

Figure S2. ESI-MS spectra of C10-FL.
